# Supplementary material
Source: PubMed Central journal article supplement (PMC6213321)
Supplement: blood846592-suppl1.pdf [file blood846592-suppl1.pdf]

## **Supplemental Data**

### **Evaluation of oral anticoagulants with vitamin K epoxide reductase in its native milieu**

Xuejie Chen, Da-Yun Jin, Darrel W. Stafford, and Jian-Ke Tie

Department of Biology, University of North Carolina at Chapel Hill, Chapel Hill,  
North Carolina 27599, USA

**Correspondence:** Jian-Ke Tie

Department of Biology

University of North Carolina at Chapel Hill

Chapel Hill, NC 27599, USA

Email: [jktie@email.unc.edu](mailto:jktie@email.unc.edu)

**The Supplemental Data includes:**

Supplemental Tables 1 to 6

Supplemental Figure 1 to 3

## Supplemental Tables

**Supplemental Table 1 Comparison of inhibition efficiency of clinical used VKAs on VKOR activity**

| VKAs          | IC <sub>50</sub> (nM) | R square |
|---------------|-----------------------|----------|
| Warfarin      | 5.1 ± 0.5             | 0.9963   |
| Phenprocoumon | 4.2 ± 0.6             | 0.9934   |
| Fluindione    | 6.6 ± 0.7             | 0.9964   |
| Acenocoumarol | 0.81 ± 0.11           | 0.9936   |

IC<sub>50</sub> is calculated by GraphPad Prism and presented as mean ± SD  
(Standard Deviation).

**R square:** correlation coefficient.

**Supplemental Table 2 EC<sub>50</sub> of KO for naturally occurring VKOR mutations**

| <b>VKOR mutations</b> | <b>EC<sub>50</sub> ± SD (nM)</b> | <b>VKOR mutations</b> | <b>EC<sub>50</sub> ± SD (nM)</b> |
|-----------------------|----------------------------------|-----------------------|----------------------------------|
| Wide-type             | 27.6 ± 1.9                       | S56F                  | 24.4 ± 1.9                       |
| A26P                  | 40.8 ± 4.9                       | R58G                  | 26.6 ± 0.8                       |
| A26T                  | 22.2 ± 2.7                       | W59R                  | 42.0 ± 5.3                       |
| L27V                  | 28.8 ± 1.6                       | W59C                  | 43.9 ± 6.9                       |
| H28Q                  | 20.4 ± 2.4                       | W59L                  | 35.2 ± 1.6                       |
| V29L                  | 37.3 ± 3.7                       | V66G                  | 37.3 ± 3.1                       |
| A34P                  | 32.2 ± 4.8                       | V66M                  | 29.1 ± 3.3                       |
| D36G                  | 28.1 ± 2.5                       | H68Y                  | 26.1 ± 1.7                       |
| D36Y                  | 26.6 ± 3.4                       | G71A                  | 26.1 ± 3.8                       |
| A41S                  | 22.3 ± 2.0                       | N77S                  | 30.0 ± 2.8                       |
| V45A                  | 24.1 ± 2.4                       | N77Y                  | 27.9 ± 3.4                       |
| S52L                  | 35.8 ± 4.4                       | I123N                 | 25.5 ± 4.1                       |
| S52W                  | 31.4 ± 4.8                       | L128R                 | 55.2 ± 5.1                       |
| V54L                  | 26.2 ± 2.4                       | Y139H                 | 63.5 ± 5.3                       |

**Supplemental Table 3 Apparent Vmax and Km of VKOR reducing KO under different fluindione concentrations determined by cell-based assay**

| <b>Fluindione (nM)</b> | <b>Vmax (nM/min, x10<sup>-5</sup>)</b> | <b>Km (nM)</b> |
|------------------------|----------------------------------------|----------------|
| 30                     | 109.1 ± 1.5                            | 626.6 ± 24.8   |
| 15                     | 127.0 ± 2.7                            | 544.8 ± 34.9   |
| 7.5                    | 137.1 ± 2.5                            | 486.9 ± 28.1   |
| 3.75                   | 133.3 ± 4.5                            | 322.6 ± 37.4   |
| 1.88                   | 127.2 ± 5.9                            | 163.1 ± 30.1   |
| 0.94                   | 126.7 ± 3.2                            | 69.5 ± 8.1     |
| 0                      | 146.9 ± 2.3                            | 53.6 ± 4.0     |

**Supplemental Table 4 R square of fitting fluindione inhibition of VKOR by non-linear regression with different inhibition models**

| Fluindione (nM)        | Inhibition model |                |               |                  |
|------------------------|------------------|----------------|---------------|------------------|
|                        | Competitive      | Noncompetitive | Uncompetitive | Mixed type       |
| 30                     | <b>0.9344</b>    | 0.8246         | 0.7411        | -                |
| 15                     | <b>0.9823</b>    | 0.8908         | 0.8327        | -                |
| 7.5                    | <b>0.995</b>     | 0.8995         | 0.8731        | -                |
| 3.75                   | <b>0.9622</b>    | 0.9095         | 0.9158        | -                |
| 1.88                   | <b>0.9392</b>    | 0.9347         | 0.9469        | -                |
| 0.94                   | <b>0.9751</b>    | 0.8913         | 0.8594        | -                |
| 0                      | <b>0.9597</b>    | 0.7294         | 0.6388        | -                |
| <b>Global (shared)</b> | <b>0.9722</b>    | <b>0.892</b>   | <b>0.8613</b> | <b>Ambiguous</b> |

**Supplemental Table 5 Apparent Vmax and Km of VKOR reducing KO under different warfarin concentrations determined by cell-based assay**

| <b>Warfarin (nM)</b> | <b>Vmax (nM/min, x10<sup>-5</sup>)</b> | <b>Km (nM)</b> |
|----------------------|----------------------------------------|----------------|
| 20                   | 80.3 ± 1.4                             | 970.0 ± 45.0   |
| 10                   | 112.1 ± 3.8                            | 851.6 ± 78.1   |
| 5                    | 139.0 ± 5.3                            | 616.6 ± 69.0   |
| 2.5                  | 140.0 ± 8.7                            | 364.4 ± 76.1   |
| 1.25                 | 152.8 ± 8.8                            | 168.5 ± 38.2   |
| 0.625                | 172.7 ± 6.2                            | 79.7 ± 12.7    |
| 0                    | 188.7 ± 2.2                            | 49.7 ± 2.7     |

**Supplemental Table 6 R square of fitting warfarin inhibition of VKOR by non-linear regression with different inhibition models**

| Warfarin (nM)          | Inhibition model |                |               |               |
|------------------------|------------------|----------------|---------------|---------------|
|                        | Competitive      | Noncompetitive | Uncompetitive | Mixed type    |
| 20                     | 0.8562           | 0.5966         | 0.3454        | <b>0.9517</b> |
| 10                     | 0.9204           | 0.708          | 0.4868        | <b>0.9852</b> |
| 5                      | 0.9638           | 0.8035         | 0.6526        | <b>0.9892</b> |
| 2.5                    | 0.9026           | 0.8239         | 0.7486        | <b>0.9191</b> |
| 1.25                   | 0.9266           | 0.9117         | 0.9068        | <b>0.9367</b> |
| 0.62                   | 0.8737           | 0.953          | 0.9452        | <b>0.9373</b> |
| 0                      | 0.9686           | 0.8898         | 0.8268        | <b>0.9911</b> |
| <b>Global (shared)</b> | <b>0.9545</b>    | <b>0.9178</b>  | <b>0.8741</b> | <b>0.9752</b> |

# Supplemental Figure

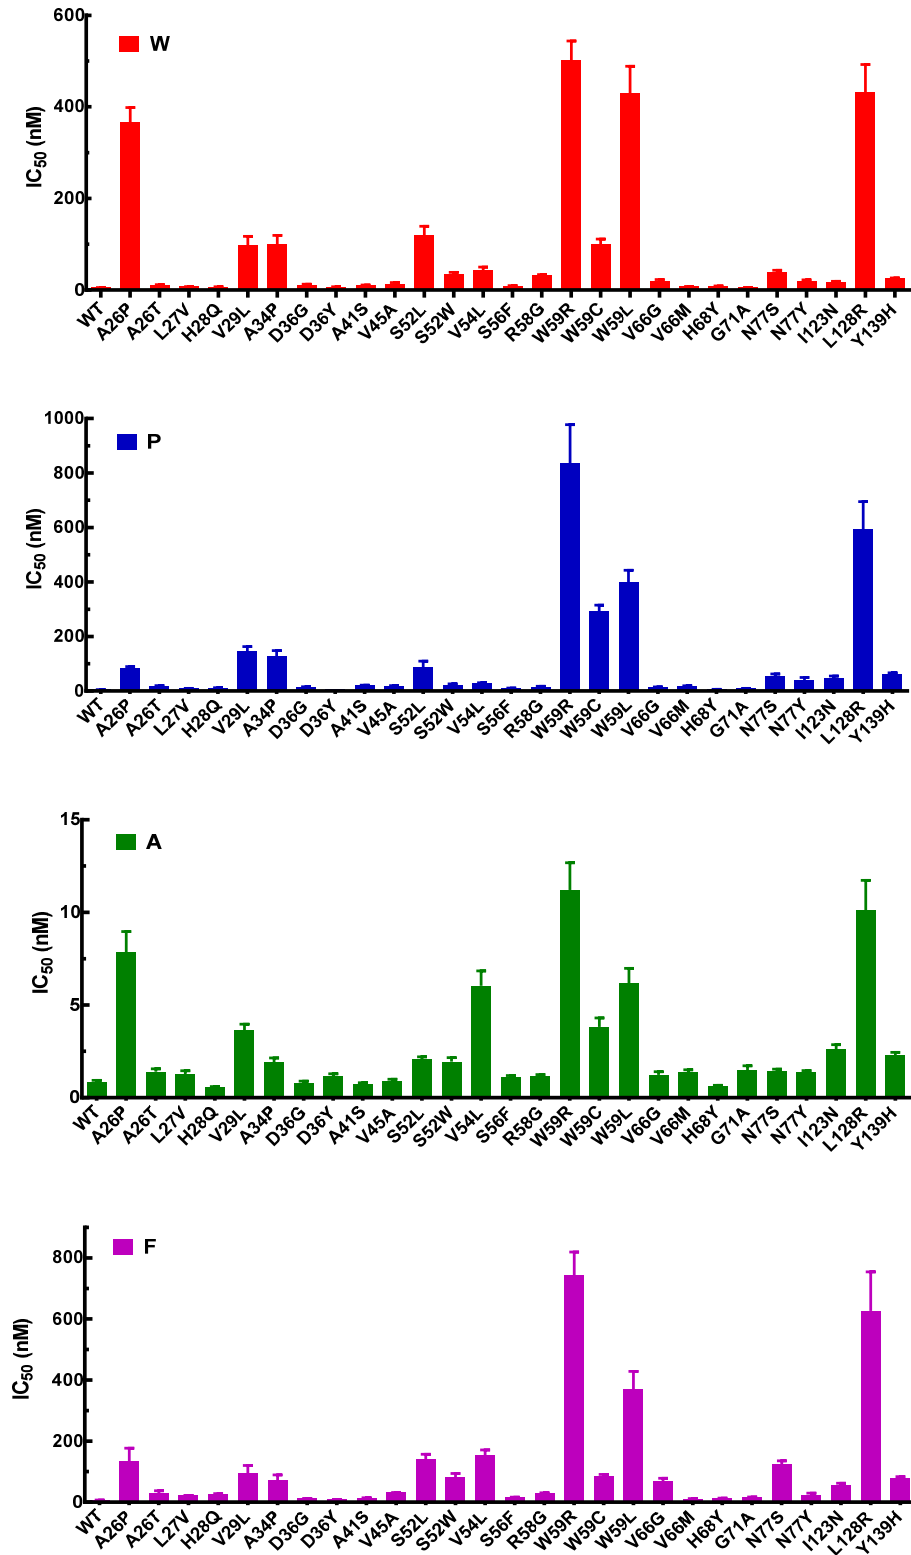

**Supplemental Figure 1** Half-maximal inhibition (IC<sub>50</sub>) of clinically used VKAs for the naturally occurring VKOR mutations. For a better visualization, data from Table 1 were presented as column charts for side-by-side comparison. W: warfarin, P: phenprocoumon, A: acenocoumarol, F: fludione.



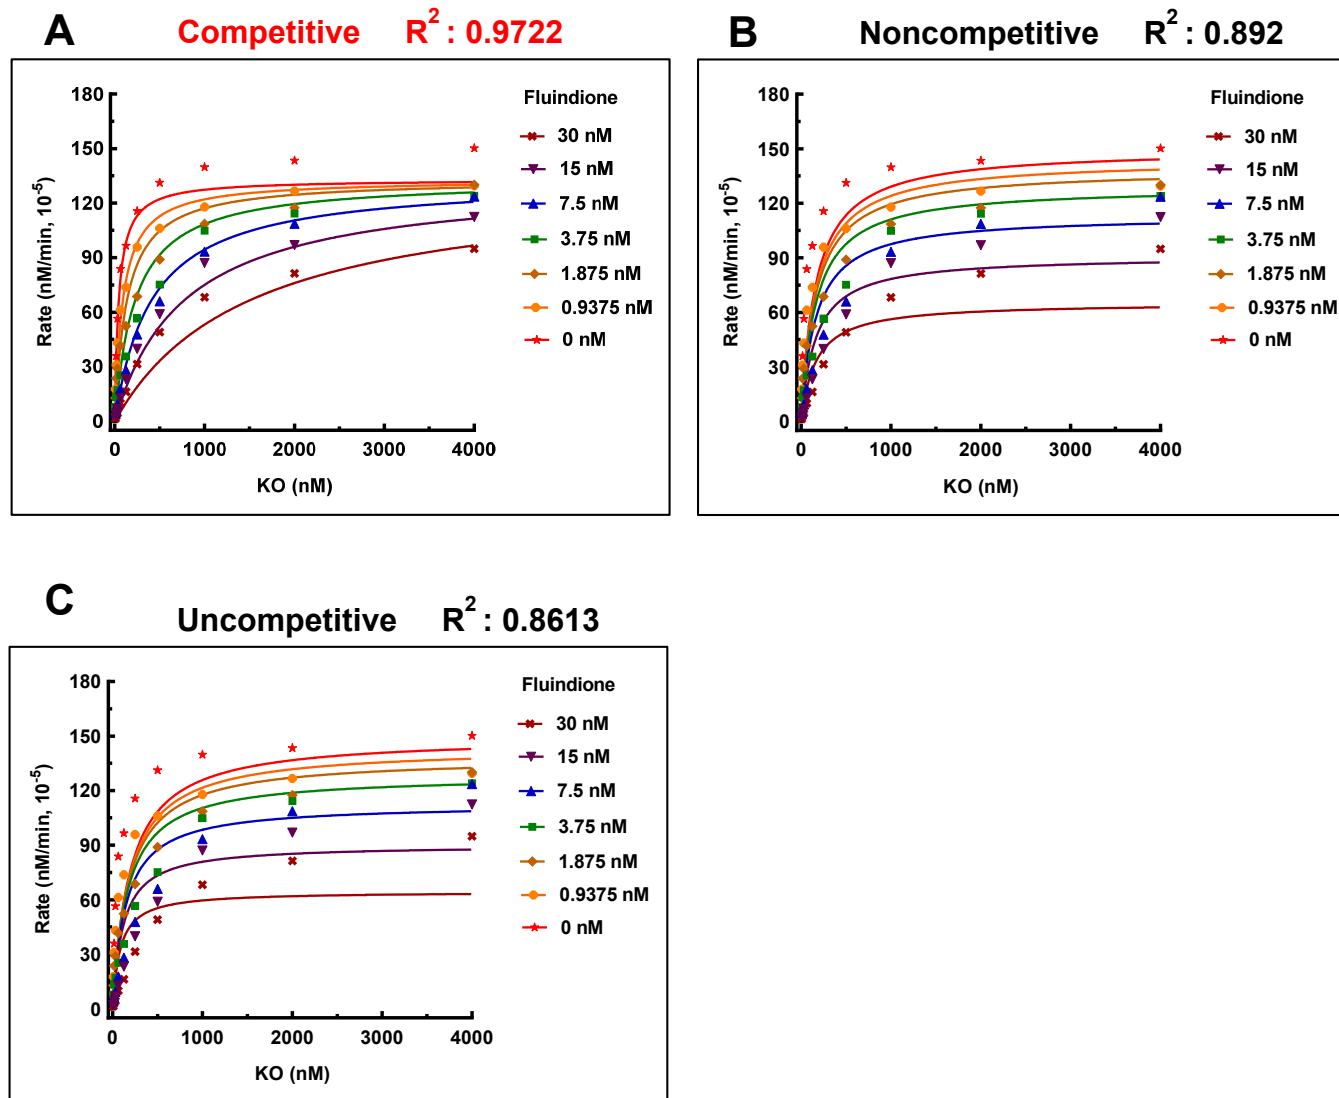

**Supplemental Figure 2** Fitting kinetics data of fluidione inhibition of VKOR to different inhibition models by non-linear regression using GraphPad Prism. Experimental data are the same as in Figure 5A.

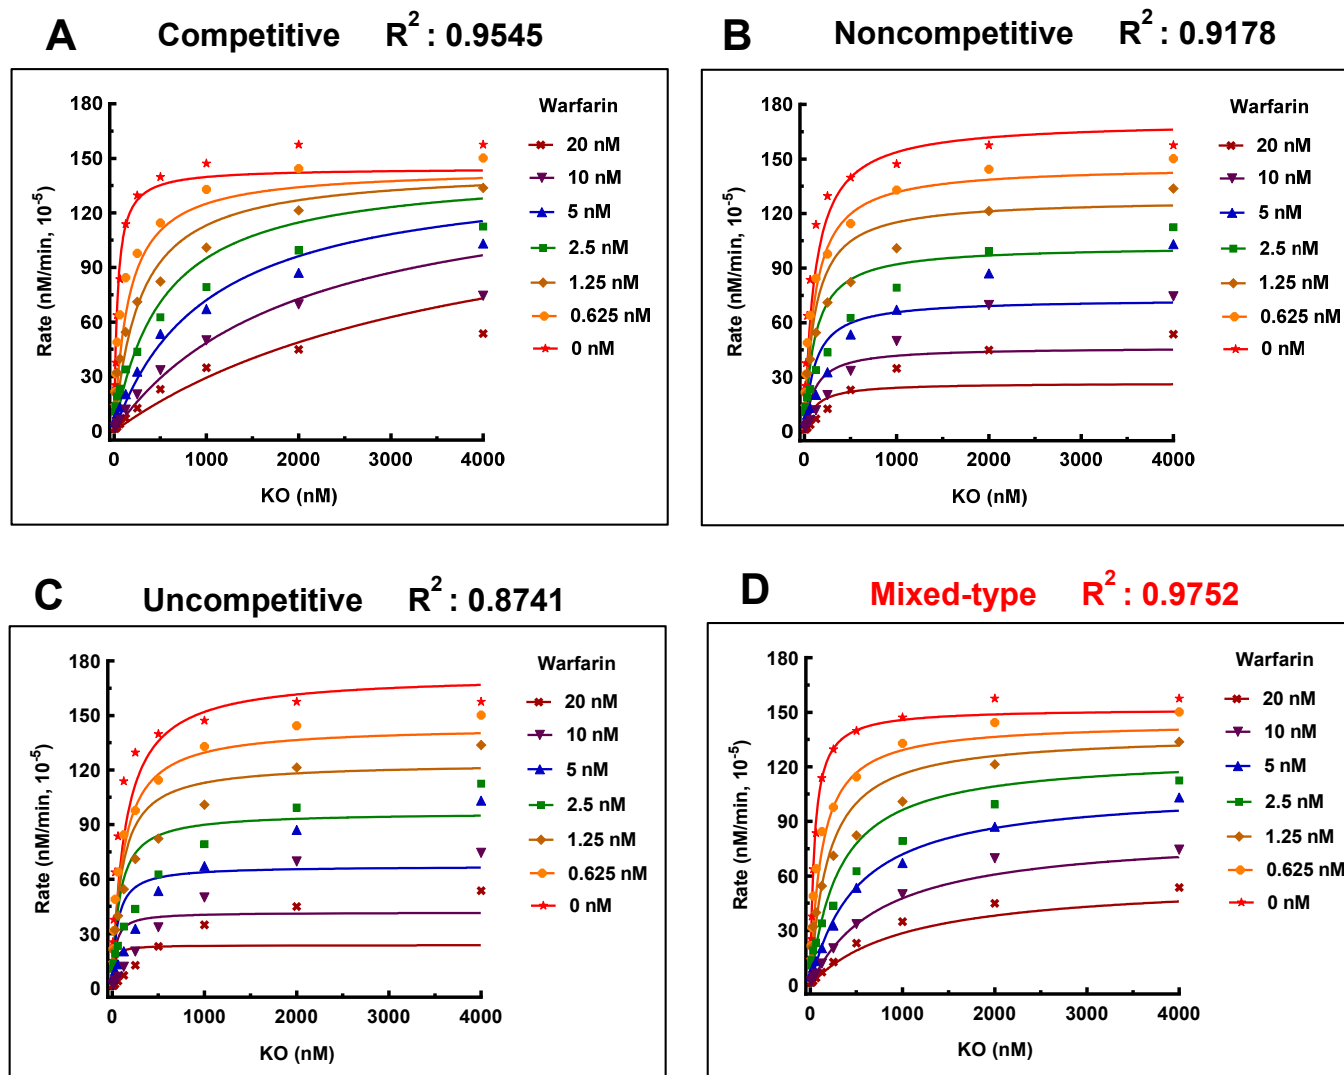

**Supplemental Figure 3** Fitting kinetics data of warfarin inhibition of VKOR to different inhibition models by non-linear regression using GraphPad Prism. Experimental data are the same as in Figure 5D.
